# Supplementary material for: The synergistic effect of Lactobacillus plantarum CCFM242 and zinc on ulcerative colitis through modulating intestinal homeostasis
Source: Royal Society of Chemistry journal article supplement (doi:10.1039/c9fo00926d), 2019-01-01
Supplement: c9fo00926d1.pdf [file c9fo00926d1.pdf]

**Table S1 Concentration of SCFAs in the colonic contents of mice**

| SCFAs ( $\mu\text{mol/g}$ ) | Control            | 242                | Zn+242             |
|-----------------------------|--------------------|--------------------|--------------------|
| Acetic acid                 | $26.46 \pm 2.09^a$ | $34.66 \pm 2.12^b$ | $39.98 \pm 1.61^c$ |
| Propanoic acid              | $9.01 \pm 0.37^a$  | $11.21 \pm 0.38^b$ | $13.69 \pm 0.44^c$ |
| Butanoic acid               | $2.53 \pm 0.12^a$  | $2.75 \pm 0.21^a$  | $4.47 \pm 0.22^c$  |
| Isobutyric acid             | $1.15 \pm 0.07^a$  | $1.15 \pm 0.16^a$  | $1.33 \pm 0.15^a$  |
| Isopentanoic acid           | $0.16 \pm 0.13^a$  | $0.22 \pm 0.07^a$  | $0.18 \pm 0.09^a$  |
| Total SCFAs                 | $39.31 \pm 2.03^a$ | $49.98 \pm 2.01^b$ | $59.65 \pm 1.56^c$ |

Values are mean  $\pm$  SEM values with six mice in each group. The superscript letters a, b, and c indicate statistically significant differences at  $P$  values of  $< 0.05$  among the groups.
